# Supplementary material
Source: PubMed Central journal article supplement (PMC2773083)
Supplement: pp.109.142729_1.pdf [file pp.109.142729_1.pdf]

**Zhao et al, Supplemental material**

**Table S1: Conserved eukaryotic cleavage and polyadenylation related factors\***

| Factors<br>(mammalian/yeast) | Subunits<br>(mammalian/yeast) | Factors<br>(plants) | Subunits<br>(Arabidopsis)     | Arabidopsis<br>gene IDs             |
|------------------------------|-------------------------------|---------------------|-------------------------------|-------------------------------------|
| CPSF/CPF                     | CPSF-160/Yhh1p                | CPSF                | AtCPSF160                     | At5g51660                           |
| CPSF/CPF                     | CPSF-100/Ydh1p                | CPSF                | AtCPSF100                     | At5g23880                           |
| CPSF/CPF                     | CPSF-73/Ysh1p                 | CPSF                | AtCPSF73-I                    | At1g61010                           |
| unknown/none                 | RC-68/none                    | CPSF                | AtCPSF73-II                   | At2g01730                           |
| CPSF/CPF                     | CPSF-30/Yth1p                 | CPSF                | AtCPSF30                      | At1g30460                           |
| CPSF/CPF                     | hFip1/Fip1p                   | CPSF                | AtFIP5                        | At5g58040                           |
| unknown/CPF                  | hPfs2/Pfs2                    | CPSF                | AtFY                          | At5g13480                           |
| CstF/CF IA                   | CstF-77/Rna14p                | CstF                | AtCstF77                      | At1g17760                           |
| CstF/CF IA                   | CstF-64/Rna15p                | CstF                | AtCstF64                      | At1g71800                           |
| CstF/none                    | CstF-50/None                  | CstF                | AtCstF50                      | At5g60940                           |
| CstF/none                    | CFIm-25/None                  |                     | None                          |                                     |
| CstF/none                    | CFIm-68/None                  |                     | None                          |                                     |
| CF IIm/CF IA                 | hPcf11/Pcf11p                 | Unknown             | AtPCFS1<br>AtPCFS4<br>AtPCFS5 | At1g66500<br>At4g04885<br>At5g43620 |
| CF IIm/CF IA                 | hClp1/Clp1p                   | Unknown             | AtCLPS3<br>AtCLPS5            | At3g04680<br>At5g39930              |
| unknown/CPF                  | Symplekin/Pta1p               | Unknown             | AtSYM5                        | At5g01400                           |

\*Note: Factors that are not discussed in this paper, such as poly(A) polymerase (PAP), RNA polymerase II C-terminal domain (Pol II CTD), and poly(A) binding protein II (PABP II), are not listed in this table. For a detailed list of eukaryotic cleavage and polyadenylation factors, please refer to Mandel et. al., 2008.

**Zhao et al, Supplemental material.**

**Table S3. Polyadenylation-related proteins purified via TAP-fused AtCPSF and AtCLPS3**

| Identified proteins                                | Locus ID  | Functions                                                                                                                                                                                                                                                                                                           |
|----------------------------------------------------|-----------|---------------------------------------------------------------------------------------------------------------------------------------------------------------------------------------------------------------------------------------------------------------------------------------------------------------------|
| From TAP-vector purified plant proteins            |           |                                                                                                                                                                                                                                                                                                                     |
| None                                               |           |                                                                                                                                                                                                                                                                                                                     |
| From TAP-AtCPSF30 purified plant proteins          |           |                                                                                                                                                                                                                                                                                                                     |
| AtCPSF30 <sup>[1],[2]</sup>                        | At1g30460 | The 30 kDa subunit of cleavage and polyadenylation specificity factor (CPSF); interacts with itself and with calmodulin; binding to RNA is inhibited by calmodulin in a calcium-dependent fashion (Delaney et al., 2006; Addepalli and Hunt, 2007; Hunt et al., 2008)                                               |
| AtFIPS5 <sup>[1],[3]</sup>                         | At5g58040 | A subunit of the polyadenylation apparatus that interacts with and stimulates the activity of poly(A) polymerase; RNA-binding protein; interacts with several polyadenylation factor subunits and coordinates a number of polyadenylation factor subunits with PAP and RNA (Forbes et al., 2006; Hunt et al., 2008) |
| <b>From TAP-AtCPSF73-I purified plant proteins</b> |           |                                                                                                                                                                                                                                                                                                                     |
| AtCPSF73-I <sup>[1],[2]</sup>                      | At1g61010 | The 73 kDa subunit of CPSF; contains RNA-metabolizing domain (metallo-beta-lactamase) (Ryan et al., 2004; Dominski et al., 2005; Mandel et al., 2006; Xu et al., 2006; Hunt et al., 2008)                                                                                                                           |
| AtCPSF100 <sup>[1],[2]</sup>                       | At5g23880 | The 100 kDa of CPSF; localized in nucleus; potentially functions in protein and DNA binding (Herr et al., 2006; Hunt et al., 2008; Mandel et al., 2008)                                                                                                                                                             |
| AtCPSF160 <sup>[2]</sup>                           | At5g51660 | The 160 kDa subunit of CPSF; localized in nucleus; has nucleic acid binding activity (Hunt et al., 2008; Mandel et al., 2008)                                                                                                                                                                                       |
| AtFY <sup>[2]</sup>                                | At5g13480 | A protein with similarity to yeast Pfs2p; an mRNA processing factor; involved in regulation of flowering time; affects FCA mRNA processing; has protein binding domains (Herr et al., 2006; Hunt et al.,                                                                                                            |

|                                                     |           |                                                                                                                                                                                                                                                       |
|-----------------------------------------------------|-----------|-------------------------------------------------------------------------------------------------------------------------------------------------------------------------------------------------------------------------------------------------------|
| AtCLPS3 <sup>[1]</sup>                              | At2g06480 | 2008)<br>pre-mRNA cleavage family complex protein (Hunt et al., 2008; Xing et al., 2008a)                                                                                                                                                             |
| <b>From TAP-AtCPSF73-II purified plant proteins</b> |           |                                                                                                                                                                                                                                                       |
| AtCPSF30 <sup>[1]</sup>                             | At1g30460 | The same as described above                                                                                                                                                                                                                           |
| AtCPSF73-II <sup>[1], [3]</sup>                     | At2g01730 | A homolog of AtCPSF73-I that plays an essential role in the development of female gametophyte and embryo (Hunt et al., 2008)                                                                                                                          |
| AtCPSF100 <sup>[2]</sup>                            | At5g23880 | The same as described above                                                                                                                                                                                                                           |
| AtCPSF160 <sup>[2]</sup>                            | At5g51660 | The same as described above                                                                                                                                                                                                                           |
| AtFY <sup>[2]</sup>                                 | At5g13480 | The same as described above                                                                                                                                                                                                                           |
| <b>From TAP-AtCPSF100 purified plant proteins</b>   |           |                                                                                                                                                                                                                                                       |
| CPSF100 <sup>[1]</sup>                              | At5g23880 | The same as described above                                                                                                                                                                                                                           |
| CPSF160 <sup>[1]</sup>                              | At5g51660 | The same as described above                                                                                                                                                                                                                           |
| <b>From TAP-AtCLPS3 purified plant proteins</b>     |           |                                                                                                                                                                                                                                                       |
| AtCLPS3 <sup>[1], [2]</sup>                         | At3g04680 | The same as described above                                                                                                                                                                                                                           |
| AtPCFS4 <sup>[1], [3]</sup>                         | At4g04885 | A homolog of yeast polyadenylation factor Protein 1 of Cleavage Factor (Pcf11p); involves in mRNA polyadenylation; regulates FCA (AT4G16280) mRNA polyadenylation; promotes flowering time (Herr et al., 2006; Hunt et al., 2008; Xing et al., 2008b) |
| AtSYM5 <sup>[1], [3]</sup>                          | At5g01400 | A subunit of CPSF; Symplekin/Pta1 homologue that has potential to interact with either ESP1 or AtCstF64; involves in posttranscriptional gene silencing by RNA and RNA processing (Herr et al., 2006)                                                 |
| <b>From TAP-AtFY purified plant proteins</b>        |           |                                                                                                                                                                                                                                                       |
| AtFY <sup>[1], [2]</sup>                            | At5g13480 | The same as described above                                                                                                                                                                                                                           |
| AtCPSF73-II <sup>[1], [3]</sup>                     | At2g01730 | The same as described above                                                                                                                                                                                                                           |
| AtCPSF100 <sup>[1], [2]</sup>                       | At5g23880 | The same as described above                                                                                                                                                                                                                           |
| AtCPSF160 <sup>[2]</sup>                            | At5g51660 | The same as described above                                                                                                                                                                                                                           |

Note:

[1]. Polyadenylation-related proteins identified by mass-spectrometry

[2]. Polyadenylation-related proteins identified by antibodies

[3]. Antibody not available

Zhao et al., Supplemental material.

**Table S4. Sequence information of MS identified polyadenylation related protein factors.**

The peptides high-lighted in red were confidently identified by MS.

| Bait protein | Interacting protein identified by MS |                   |                    | Sequence coverage (%)         |
|--------------|--------------------------------------|-------------------|--------------------|-------------------------------|
| AtCPSF30     | AtCPSF30                             |                   |                    | 26                            |
| 1            | MGTSVQVTPL                           | CGVYNENPLS        | YLVSIDGFNF         | LIDCGWNDLF DTSLLEPLPR         |
| 51           | VASTIDAVLL                           | SHPDTLHIGA        | LPYAMK <b>QLGL</b> | <b>SAPVYATEPV</b> HRLGLLLTMYD |
| 101          | QFLSRKQVSD                           | FDLFTLDDID        | SAFQNVIRLT         | YSQNYHLSGK GEGIVIAPHV         |
| 151          | AGHMLGGSIW                           | RITKDGEDVI        | YAVDYNHRKE         | RHLNGTVLQS FVRPAVLITD         |
| 201          | AYHALYTNQT                           | ARQQRDKEFL        | DTISKHLEVG         | GNVLLPVDTA GRVLELLLIL         |
| 251          | EQHWSQRGFS                           | FPIYFLTYVS        | SSTIDYVKSF         | LEWMSDSISK SFETSRDNAF         |
| 301          | LLRHVTLIN                            | KTDLDNAPPG        | PKVVLASMAS         | LEAGFAREIF VEWANDPRNL         |
| 351          | <b>VLFTETGQFG</b>                    | <b>TLARMLQSAP</b> | PPKFVKVTMS         | KRVPLAGEEL IAYEEEEQNR         |
| 401          | KREEALRASL                           | VKEEETKASH        | GSDDNSSEPM         | IIDTKTHDV VGSHGPAYKD          |
| 451          | ILIDGFVPPS                           | SSVAPMFPYY        | DNTSEWDDFG         | EIINPDDYVI KDEDMDRGAM         |
| 501          | HNGGDVDGRL                           | DEATASMLD         | TRPSKVSMSNE        | LIVTVSCSLV KMDYEGRSDG         |
| 551          | RSIKSMIAHV                           | SPLKLVVHA         | IAEATEHLKQ         | HCLNNICPHV YAPQIETVD          |
| 601          | VTSDLCAKVV                           | QLSEKLMSNV        | <b>IFKKLGDSEV</b>  | <b>AWVDSEVGKT</b> ERDMRSLLP   |
| 651          | PGAASPHKPV                           | LVGDLKIADF        | KQFLSSKGVQ         | VEFAGGGALR CGEYVTLRKV         |
| 701          | GPTGQKGGAS                           | GPQQILIEGP        | LCEDYYKIRD         | YLYSQFYLL                     |

  

| Bait protein | Interacting protein identified by MS |            |                   | Sequence coverage (%)       |
|--------------|--------------------------------------|------------|-------------------|-----------------------------|
| AtCPSF30     | AtFIPS5                              |            |                   | 1                           |
| 1            | NEEDDEFDGL                           | YSDVLQPFQP | PVVLPPPPPL        | PHRSIDLNLR SQDQDVSEPN       |
| 51           | SAPISRVSND                           | DAVKLSTQDA | TRQAIVDGGG        | DDKDMSFDIE EPDADSTPTI       |
| 101          | PGLFVTGALP                           | GLATDRGVSQ | VTTRIEQQVG        | GGDGGYGGQ GEGDDWSDS         |
| 151          | EDDLQIVLND                           | SSRNVHIGGA | DRSRMGDNE         | DDDEDDEDP LVIVADTDPN        |
| 201          | QMEEQHWGE                            | DGLQIEGDG  | <b>KDGGEAGKGS</b> | <b>GPGGATGPPK</b> AGYSSHGYP |
| 251          | FHSQFKYVRP                           | GAAPIPGGA  | SVGGPSSGQV        | RPPANLGPMA GRGRGDWRPL       |
| 301          | GMRNASAAQK                           | GFHQPWGSNT | AGRGLDFTLP        | SHKTIFEVDI DSFEKWPYR        |
| 351          | PGVENTDYFN                           | FGLNEESWKD | YCKQLDQHRI        | QTTMQSRIRV YESGRTDQGY       |
| 401          | DPDLPELAA                            | ATGAQGVVD  | SSNLVKPDSV        | QGDSAKVPAN VRPTLPPGRP       |
| 451          | IPVETGSGER                           | LPSIDTRAPR | MRDLDAIIE         | SHEDEPSGEN GTDQADSSLP       |
| 501          | GENVPVETSY                           | VNKRPTDES  | AHSPAQDEP         | HKNLLKKQDD EISRSTDSGQ       |
| 551          | SFRSSSPVGD                           | RGTRSSSVDR | EDVGGGAGKD        | AEMGEELKMS FTSPQSAVQE       |
| 601          | DDGGESKTER                           | SSESSKARSG | SHRDFQQEED        | VIQDKHSSRP ANNRKQYDNN       |
| 651          | APHQSRKNQD                           | RGKEMERTRA | ASKGGRENSN        | PHMELDSTYI YSIASREDFD       |
| 701          | KRKERDVGGA                           | VWRRKEDDYP | SRRGGDEGSR        | KRDREDDPGF RQRGKMRNE        |
| 751          | IRSKDDQVPS                           | RKHMDDAGMR | NIYEPDDHIN        | KRRKDEEYLR RSRPEKNEIS       |
| 801          | YGQRESMSRV                           | KRERDDRLEH | QKRVDQHKIR        | DDFDDHGSLR QRDDIYMQRD       |
| 851          | GNERLRERDV                           | LDKLLPHED  | GISARGRERQ        | VAVRGHRGSE DRSSRMKDEY       |
| 901          | KASDKHEVTK                           | DLRHAKQTK  | RRDYPGEES         | SHRHGHEDFS ARTDNIVNNE       |
| 951          | KKPRQERTGA                           | KIDKFIIDLD | GQRLQDRKHK        | DSRRKIKEQR EGTESLSKQG       |
| 1001         | EQNGSSVVTG                           | SKGTNDARNC | RSEIPHQPNT        | AKRHKENASS GDEIHDSCRK       |
| 1051         | RTKLERWASH                           | KEREDAVSAK | SSSISKLEE         | KENNTNGRLS EPVHGSIGKS       |
| 1101         | RDVTEEKIGH                           | DLADTKDGSE | KGPGDRHLD         | VEKLRKRSER FKLPMPTKED       |
| 1151         | TTGVKKHESE                           | TLPSAKIEGP | VDSEGEYVWD        | ERSCVRIGRE YA               |

| Bait protein | Interacting protein identified by MS |                                              | Sequence coverage (%) |
|--------------|--------------------------------------|----------------------------------------------|-----------------------|
| AtCPSF73-I   | AtCPSF73-I                           |                                              | 50                    |
| 1            | MASSTSLKR                            | REQPISRDCD QLIVTPLGAG SEVGRSCVYM SFRGKNILFD  |                       |
| 51           | CGIHPAYSGM                           | AALPYFDEID PSSIDVLLIT HFHIDHAASL PYFLEKTTFN  |                       |
| 101          | GRVFMTHATK                           | AIYKLLLLTDY VKVSKVSVED MLFDEQDINK SMDKIEVIDF |                       |
| 151          | HQTVEVNGIK                           | FWCYTAGHVL GAAMFMVDIA GVRILYTGDY SREEDRHLRA  |                       |
| 201          | AELPQFSPDI                           | CIIESTSGVQ LHQSRHIREK RFTDVIHSTV AQQGRVLIPIA |                       |
| 251          | FALGRAQELL                           | LILDEYWANH PDLHNIPIYY ASPLAKKCMS VYQTYILSMN  |                       |
| 301          | DRIRNQFANS                           | NPFVFKHISP LNSIDDFNDV GPSVVMATPG GLQSGLSRQL  |                       |
| 351          | FDSWCSKKN                            | ACIIPGYMVE GTLAKTIINE PKEVTLMNGL TAPLNMQVHY  |                       |
| 401          | ISFSAHADYA                           | QTSTFLKELM PPNIILVHGE ANEMMLRKQK LLTEFPDGNT  |                       |
| 451          | KIMTPKNCES                           | VEMYFNSEKL AKTIGRLAEK TPDVGDVTVSG ILVKKGFTYQ |                       |
| 501          | IMAPDELHVF                           | SQLSTATVTQ RITIPFVGAF GVIKHRLEKI FESVEFSTDE  |                       |
| 551          | ESGLPALKVH                           | ERVTVKQESE KHISLQWSSD PISDMVSDSI VALILNISRE  |                       |
| 601          | VPKIVMEED                            | AVKSEEENGK KVEKVIYALL VSLFGDVKLG ENGLKIVRVD  |                       |
| 651          | GNVAQLDKES                           | GEVESEHSGL KERVRVAFER IQSAVKPIPL SAS         |                       |

| Bait protein | Interacting protein identified by MS |                                              | Sequence coverage (%) |
|--------------|--------------------------------------|----------------------------------------------|-----------------------|
| AtCPSF73-I   | AtCLPS3                              |                                              | 19                    |
| 1            | MAYGGPSMNP                           | PALSGAVPGS ANLKQVKLER ESELRIEVSE EPLRLRVVNG  |                       |
| 51           | TAEIFGSELP                           | PEIWRTFPPR MKFAVFTWYG ATIEMDGVTE TDYTADETPM  |                       |
| 101          | VSYINVHAIL                           | DARRRFAKAS TSNDPESSQG PRVIVVGPTD SGKSTLTKML  |                       |
| 151          | LSWAAKQGWR                           | PTFVDLDVGQ GSITIPGSIA AAPIEMPLDP VEGFPLDMAL  |                       |
| 201          | VYYYGHASPN                           | MNVELYKALV KELAQVLEKQ FVGNPESRAA GMVINTMGWI  |                       |
| 251          | EGIGYELLH                            | AIDTFNASVV LVLGQEKLF S RLKDVLRSKS NVDVVKLHKS |                       |
| 301          | GGVVARVKEV                           | RKRSRNFKIQ EYFYGLSKEL SPYANTSSFS DLQVFRIGGG  |                       |
| 351          | PQAPKSALPA                           | GSTSVSNPLR VTPVNIDDRD LLHSLAVSY AEEPQIISS    |                       |
| 401          | NVSGFVYVTE                           | VNVQKKKITY LAPSPGTLPS KLLVAGSLAW LESV        |                       |

| Bait protein | Interacting protein identified by MS |                                              | Sequence coverage (%) |
|--------------|--------------------------------------|----------------------------------------------|-----------------------|
| AtCPSF73-I   | AtCPSF100                            |                                              | 6                     |
| 1            | MGTSVQVTPL                           | CGVYNENPLS YLVSIDGFNF LIDCGWNDLF DTSLLEPLPR  |                       |
| 51           | VASTIDAVLL                           | SHPDTLHIGA LPYAMKQLGL SAPVYATEPV HRLGLLLTMYD |                       |
| 101          | QFLSRKQVSD                           | FDLFTLDDID SAFQNVIRLT YSQNYHLSGK GEGIVIAPHV  |                       |
| 151          | AGHMLGGSIW                           | RITKDGEDVI YAVDYNHRKE RHLNGTVLQS FVRPAVLITD  |                       |
| 201          | AYHALYTNQT                           | ARQQRDKEFL DTISKHLEVG GNVLLPVDTA GRVLELLLIL  |                       |
| 251          | EQHWSQRGFS                           | FPIYFLTYVS SSTIDYVKSF LEWMSDSISK SFETSRDNAF  |                       |
| 301          | LLRHVTLIN                            | KTDLDNAPPG PKVVLASMAS LEAGFAEIF VEWANDPRNL   |                       |
| 351          | VLFTETGQFG                           | TLARMLQSAP PPKFVKVTMS KRVPLAGEEL IAYEEEQNRL  |                       |
| 401          | KREEALRASL                           | VKEEETKASH GSDDNSSEPM IIDTKTTHDV VGSHPAYKD   |                       |
| 451          | ILIDGFVPPS                           | SSVAPMFPYY DNTSEWDDFG EIINPDDYVI KDEDMDRGAM  |                       |
| 501          | HNGGDVDGRL                           | DEATASLMLD TRPSKMSNE LIVTVSCSLV KMDYEGRS DG  |                       |
| 551          | RSIKSMIAHV                           | SPLKLVVHA IAEATEHLKQ HCLNNICPHV YAPQIEETVD   |                       |
| 601          | VTSDLCAYKV                           | QLSEKLMSNV IFKKLGDSEV AAVDSEVGKT ERDMRSLLPM  |                       |
| 651          | PGAASPHKPV                           | LVGDLKIADF KQFLSSKGVQ VEFAGGGALR CGEYVTLRKV  |                       |
| 701          | GPTGQKGGAS                           | GPQQILIEGP LCEDYYKIRD YLYSQFYLL              |                       |

| Bait protein | Interacting protein identified by MS |                              | Sequence coverage (%)        |
|--------------|--------------------------------------|------------------------------|------------------------------|
| AtCPSF73-II  | AtCPSF30                             |                              | 10                           |
| 1            | MEDADGLSFD                           | FEGGLDSGPV QNTASVPVAP        | PENSSSAAVN VAPTYDHSSA        |
| 51           | TVAGAGRGRS                           | FRQTVCRHWL RGLCMKGDAC        | GFLHQFDKAR MPICRFRLY         |
| 101          | GECREQDCVY                           | KHTNEDIKEC NMYKLGFCPN        | GPDCRYRHAK <b>LPGPPPVVEE</b> |
| 151          | <b>VLQKIQLTT</b>                     | <b>YNYGTHRLYQ</b> ARNVAPQLQD | RPOGQVPMOG QPQESGNLQQ        |
| 201          | QQQQQPQSQ                            | HQVSQTLIPN PADQTNRTSH        | PLPQGVNRCV QSPKVFNWVL        |
| 251          |                                      |                              |                              |

| Bait protein | Interacting protein identified by MS |                              | Sequence coverage (%)        |
|--------------|--------------------------------------|------------------------------|------------------------------|
| AtCPSF73-II  | AtCPSF73-II                          |                              | 35                           |
| 1            | MAIDCLVLGA                           | GQEIGKSCVV VTINGKKIMF        | DCGMHMGDD HNRYPNFSLI         |
| 51           | <b>SKSGDFDNAI</b>                    | SCIIITHFHM DHVGALPYFT        | EVCGYNGPIY MSYPTKALSP        |
| 101          | <b>LMLEDYRRVM</b>                    | VDRRGEELF TTTHIANCMK         | <b>KVIAIDLKQT IQVDEDLQIR</b> |
| 151          | AYYAGHVLGA                           | VMVYAKMGDA <b>AIVYTGDM</b>   | <b>TTDRHLGAAK IDRLQLDLI</b>  |
| 201          | SESTYATTIR                           | GSKYPREREF <b>LQAVHKCVAG</b> | <b>GGKALIPSFA LGRAQELCML</b> |
| 251          | LDDYWERMNI                           | KVPIYFSSGL TIQANMYYKM        | <b>LISWTSQNVK EKHNTNHPFD</b> |
| 301          | FKNVKDFDRS                           | LIHAPGPCVL FAIPGMLCAG        | LSLEVFKHWA PSPLNLVALL        |
| 351          | GYSVAGTVGH                           | <b>KLMAGKPTTV DLHNGTKVDV</b> | <b>RCKVHQVAFS PHTDAKIMD</b>  |
| 401          | <b>LTKFLSPKNV</b>                    | VLVHGEKPSM MILKEKITSE        | LDIPCVPAN GETVSFASTT         |
| 451          | YIKANASDMF                           | <b>LKSCSNPNFK FSNSTQLRVT</b> | <b>DHRTADGVLV IEKSKKAKIV</b> |
| 501          | <b>HQDEISEVLH</b>                    | <b>EKNHVSLAH CCPVKVKGES</b>  | <b>EDDDVDLIKQ LSAKILKTVS</b> |
| 551          | <b>GAQIHESENC</b>                    | <b>LQVASFKGS</b> CLKDKCMHRS  | SSSSSEAVFL CCNWSIADLE        |
| 601          | LGWEIINAIAK                          | LNH                          |                              |

| Bait protein | Interacting protein identified by MS |                    |                    | Sequence coverage (%) |                    |
|--------------|--------------------------------------|--------------------|--------------------|-----------------------|--------------------|
| AtCPSF100    | AtCPSF100                            |                    |                    | 40                    |                    |
| 1            | MGTSVQVTPL                           | CGVYNENPLS         | YLVSIDGFNF         | LIDCGWNDLF            | DTSLLEPLPR         |
| 51           | VASTIDAVLL                           | SHPDTLHIGA         | LPYAMK <b>QLGL</b> | <b>SAPVYATEPV</b>     | <b>HRLGLLTMVD</b>  |
| 101          | <b>QFLSRKQVSD</b>                    | FDLFTLDDID         | SAFQNVIRLT         | <b>YSQNYHLSGK</b>     | GEGIVIAPHV         |
| 151          | AGHMLGGSIW                           | RITK <b>DGEDVI</b> | <b>YAVDYNHRKE</b>  | RHLNGTVLQS            | FVRPAVLITD         |
| 201          | AYHALYTNQT                           | ARQQRDKEFL         | DTISK <b>HLEVG</b> | <b>GNVLLPVDTA</b>     | <b>GRVLELLLIL</b>  |
| 251          | EQHWSQRGFS                           | FPIYFLTYVS         | SSTIDYVKS <b>F</b> | <b>LEWMSDSISK</b>     | SFETS <b>RDNAF</b> |
| 301          | <b>LLRHVTLIN</b>                     | <b>KTDLNAPPG</b>   | <b>PKVVLASMAS</b>  | <b>LEAGFAREIF</b>     | <b>VEWANDPRNL</b>  |
| 351          | <b>VLFTETGQFG</b>                    | <b>TLARMLQSA</b>   | <b>PPK</b> FVKVTMS | KRVPLAGEEL            | IAYEEEEQNRL        |
| 401          | KREEALRASL                           | VKEEETKASH         | GSDDNSSEPM         | IIDTK <b>TTHDV</b>    | <b>VGSHGPAYKD</b>  |
| 451          | ILIDGFVPPS                           | SSVAPMFPYY         | DNTSEWDDEG         | EIINPDDYVI            | KDEDMDRGAM         |
| 501          | HNGGDVDGRL                           | <b>DEATASIMLD</b>  | <b>TRPSKVMSNE</b>  | LIVTVSCSLV            | KMDYEGRSDG         |
| 551          | RSIK <b>SMAIAHV</b>                  | <b>SPLKLVLVHA</b>  | <b>IAEATEHLKQ</b>  | HCLNNICPHV            | YAPQIEETVD         |
| 601          | VTSDLCAKVV                           | QLSEK <b>LMSNV</b> | <b>IFKKLGDSEV</b>  | <b>AWVDSEVGKT</b>     | <b>ERDMRSLLP</b>   |
| 651          | PGAASPHKPV                           | LVGDLKIADF         | KQFLSSK <b>GVQ</b> | <b>VEFAGGGALR</b>     | <b>CGEYVTLRKV</b>  |
| 701          | GPTGQK <b>GGAS</b>                   | <b>GPOQILIEGP</b>  | <b>LCEDYYKIRD</b>  | <b>YLYSQFYLL</b>      |                    |

| Bait protein | Interacting protein identified by MS |                     |                    | Sequence coverage (%) |                     |
|--------------|--------------------------------------|---------------------|--------------------|-----------------------|---------------------|
| AtCPSF100    | AtCPSF160                            |                     |                    | 30                    |                     |
| 1            | MSFAAYKMMH                           | WPTGVENCAS          | GYITHSLSDS         | TLQIPIVSVH            | DDIEAEWPNP          |
| 51           | KR <b>GIGPLPNV</b>                   | <b>VITAANILEV</b>   | <b>YIVRAQEEGN</b>  | <b>TQELRNPKLA</b>     | KRGGVMDGVY          |
| 101          | GVSLELVCHY                           | RLHGN <b>VESIA</b>  | <b>VLPMGGGNSS</b>  | <b>KGRDSIILTF</b>     | RD <b>AKISVLEF</b>  |
| 151          | <b>DDSIHSLRMT</b>                    | SMHCFEGPDW          | LHLKR <b>GRESF</b> | <b>PRGPLVKVDP</b>     | QGRCGGVLVY          |
| 201          | GLQMIILK <b>TS</b>                   | <b>QVGSGLVGDD</b>   | <b>DAFSSGGTVS</b>  | <b>ARVESSYIIN</b>     | <b>LRDLEMKHVK</b>   |
| 251          | DFVFLHGYIE                           | PVIVILQEEE          | HTWAGRVSWK         | HHTCVLSALS            | INSTLKQHPV          |
| 301          | IWSAINLPHD                           | AYKLLAVPSP          | IGGVLVLCAN         | TIHYHSQSAS            | CALALNNYAS          |
| 351          | SADSSQELPA                           | SNFSVELDAA          | HGTWISNDVA         | LLSTKSGELL            | LLTLIYDGRA          |
| 401          | VQRLDLSKSK                           | <b>ASVLASDITS</b>   | <b>VGNSLFFLGS</b>  | <b>RLGDSLIVQF</b>     | <b>SCRSGPAASL</b>   |
| 451          | <b>PGLRDEDEDI</b>                    | <b>EGEGHQAKRL</b>   | <b>RMTSDTFQDT</b>  | <b>IGNEELSIFG</b>     | <b>STPNNSDSAQ</b>   |
| 501          | <b>KSF</b> FAVRDS                    | <b>LVN</b> VGPKDF   | AYGLRINADA         | <b>NATGVSKQSN</b>     | <b>YELVCCSGHG</b>   |
| 551          | <b>KNGALCVLRQ</b>                    | SIRPEMITEV          | ELPGCKGIWT         | VYHKSSRGHN            | ADSSKMAADE          |
| 601          | DEYHAYLIIS                           | LEARTMVLET          | ADLLTEVTES         | VDYYVQGR <b>TI</b>    | <b>AAGNLFGRRR</b>   |
| 651          | <b>VIQVFEHGAR</b>                    | ILDGSFMNQE          | LSFGASNSSES        | NSGSESSTVS            | SVSIADPYVL          |
| 701          | <b>LRMTD</b> DSIRL                   | <b>LVGDP</b> STCTV  | <b>SISSP</b> SVLEG | <b>SKRK</b> ISACTL    | <b>YHDK</b> GPEPWL  |
| 751          | RKASTDAWLS                           | SGVGEAVDSV          | DGGPQDQGD          | YCVVCYESGA            | LEIFDVPSFN          |
| 801          | CVFSVDKFAS                           | GRRHLSDMPI          | HELEYELNKN         | SEDNTSSKEI            | KNTR <b>VVELAM</b>  |
| 851          | <b>QRWSGH</b> HTRP                   | FLFAVLADGT          | ILCYHAYLFD         | GVDST <b>KAENS</b>    | <b>L</b> SSENPAALN  |
| 901          | <b>SSGSS</b> KLRNL                   | KFLR <b>IPLDTS</b>  | <b>TREGTSDGVA</b>  | SQRITMFKNI            | SGHQGFFLSG          |
| 951          | SRPGWCMLFR                           | ERLRFHSQLC          | DGSIAAFTVL         | HNVNCNHGFI            | YVTAQGVLKI          |
| 1001         | CQLPSASIYD                           | NYWPVQKIPL          | <b>KATPHQ</b> VTTY | <b>AEKN</b> LYPLIV    | SYPVSKPLNQ          |
| 1051         | VLSSLVDQEA                           | GQQLDNHNMS          | SDDLQRTYTV         | EEFEIQILEP            | ER <b>SGGP</b> WETK |
| 1101         | AK <b>IPM</b> Q <b>TSEH</b>          | <b>ALT</b> VRVVTTLL | NASTGENETL         | LAVGTAYVQG            | EDVAARGRVL          |
| 1151         | LF <b>SFGK</b> NGDN                  | <b>SQNVV</b> TEVYS  | RELKGAISAV         | ASIQGHLLIS            | SGPKIILHKW          |
| 1201         | NGTELNGVAF                           | FDAPPLYVVS          | MNVVKSFILL         | GDVHK <b>SIYFL</b>    | <b>SWKEQGSQ</b> LS  |
| 1251         | <b>LLAK</b> DFESLD                   | CFATEFLIDG          | STLSLAVSDE         | <b>QKNIQV</b> FYYA    | <b>PKMIES</b> WKGL  |
| 1301         | KLLSRAEFHV                           | GAHVS <b>KFLRL</b>  | <b>QMVSSGADKI</b>  | <b>NRFALL</b> FGTL    | DGSFGCIAPL          |
| 1351         | DEVTFRR <b>LQ</b> S                  | LQKK <b>LVD</b> AVP | <b>HVAGLN</b> PLAF | <b>RQFRSSG</b> KAR    | RSGPDSIVDC          |
| 1401         | ELLCHYEMLP                           | LEEQLELAHQ          | IGTTRYSILK         | DLVDLSVGT             | FL                  |

| Bait protein | Interacting protein identified by MS |                    | Sequence coverage (%)                                |
|--------------|--------------------------------------|--------------------|------------------------------------------------------|
| AtCPSF100    | AtFY                                 |                    | 20                                                   |
| 1            | MYAGGDMHRG                           | <b>SQMPQPPMMR</b>  | QSSASSTNIN PDYHHPSGPF DPNVDSFGAK                     |
| 51           | RMRKHTQRRR                           | <b>VDYTSVVR</b>    | IQARTWQRDS RDR <b>TTLQPTP</b> <b>AAAVDMLPTV</b>      |
| 101          | <b>AYS DNPSTSF</b>                   | <b>AAK</b> FVHASLN | KNRCSINRVL WTPSGRRLIT GSQSGETLW                      |
| 151          | NGQSFNFEMI                           | LQAHDQPIRS         | MVWSHNENYM VSGDDGGTLK <b>YWQNNMNVK</b>               |
| 201          | ANKTAHKESI                           | RDLSFCKTDL         | <b>KFCSCSDDTT</b> <b>VK</b> VWDFTKCV DESSLTGHGW      |
| 251          | DVKSVDWHPT                           | <b>KSLLVSGGKD</b>  | <b>QLV</b> KLWDRS GRELCSLHGH KNIVLSVK <b>WN</b>      |
| 301          | <b>QNGNWLLTAS</b>                    | <b>KDQ</b> IIKLYDI | RTMKELQSFR GHTKDVTSLA WHPCHEEYFV                     |
| 351          | SGSSDGSICH                           | WIVGHENPQI         | EIPNAHDNSV WDLAWHPIGY LLCSGSNDHT                     |
| 401          | TKFWCRNRPA                           | DNPR <b>DVLMQN</b> | <b>QGYNEQGFGR</b> <b>QPDNFQPSA</b> <b>SPIPGAFVPG</b> |
| 451          | <b>LTRNEGTIPG</b>                    | <b>IGIAMPFDAS</b>  | <b>SQGDHKQPLP</b> GSMALGAPPL PPGPHPSLLG              |
| 501          | SGQQQGYQQQ                           | QQHQGHPPQM         | LPMPNMPHHQ LPPSSHMLPH PHHLPRPMQM                     |
| 551          | PPHGHMPPPS                           | MPMSHQMPGS         | MGMQGGMNPQ MSQSHFMGAP SGVFQGGPNS                     |
| 601          | GGPQMYPQGR                           | GGFNRPQMIP         | GYNNPFQQQQ QPPLPPGPPP NNNQQHQ                        |

| Bait protein | Interacting protein identified by MS |                    | Sequence coverage (%)                                  |
|--------------|--------------------------------------|--------------------|--------------------------------------------------------|
| AtCLPS3      | AtCLPS3                              |                    | 37                                                     |
| 1            | MAYGGPSMNP                           | PALSGAVPGS         | ANLKQVKLER <b>ESELRIEVSE</b> <b>EPLRLRVVNG</b>         |
| 51           | <b>TAEIFGSELP</b>                    | <b>PEIWR</b> TFPPR | MKFVFTWYG ATIEMDGVTE TDYTADETPM                        |
| 101          | VSYINVHAIL                           | DARRR <b>FAKAS</b> | <b>TSNDPESSQG</b> <b>PRVIVVGP</b> TD <b>SGKSTLTKML</b> |
| 151          | <b>LSWAAKQGW</b> R                   | PTFVDLDVGO         | GSITIPGSIA AAPIEMPLDP VEGFPLDMAL                       |
| 201          | VYYYGHASPN                           | MNVELY <b>KALV</b> | <b>KELAQVLEKQ</b> <b>FVGNPESRAA</b> GMVINTMGWI         |
| 251          | EGIGYELLH                            | AIDTFNASVV         | LVLGQEKLFS RLKDVLRKS NVDVVKLHKS                        |
| 301          | GGVVARVKEV                           | RKRSRNF <b>KIQ</b> | <b>EYFYGLSKEL</b> <b>SPYANTSSFS</b> <b>DLQVFRIGGG</b>  |
| 351          | <b>PQAPKSALPA</b>                    | <b>GSTSVSHPLR</b>  | <b>VTPVNIDDRD</b> LLHSLAVSY AEEPDIISS                  |
| 401          | NVSGFVYVTE                           | VNVQ <b>KKITY</b>  | <b>LAPSPGTLPS</b> <b>KLLVAGSLAW</b> LESV               |

| Bait protein | Interacting protein identified by MS |                    | Sequence coverage (%)                                 |
|--------------|--------------------------------------|--------------------|-------------------------------------------------------|
| AtCLPS3      | AtPCFS4                              |                    | 16                                                    |
| 1            | MDSEKILNPR                           | LVSINSTSRK         | GMSVELPQKP PPPPSLLDRF KALLNQREDE                      |
| 51           | FGGGEVLP                             | SMDEIVQLYE         | VVLGELTFNS KPIITDLTII AGEQREHGEG                      |
| 101          | IANAICTRIL                           | <b>EAPVEQKLP</b> S | <b>LYLLDSIVKN</b> IGRDYGRYFS SRLPEVFCLA               |
| 151          | YRQAHPSLHP                           | SMRHLFGTWS         | SVFPPVLRK IDMLQLSSA ANQSSVGASE                        |
| 201          | PSQPTRGIHV                           | NPKYLR <b>RLEP</b> | <b>SAAENNL</b> RG I NSSARVYQON SLGGYNDFED             |
| 251          | QLESPSSLSS                           | TPDGFTRRSN         | <b>DGANPSNQAF</b> <b>NYGMGR</b> ATSR DDEHMEWRRK       |
| 301          | ENLGQGNDHE                           | RPR <b>ALIDAYG</b> | <b>VDTSKHVTIN</b> KPIRDMNGMH SKMVTWPQNT               |
| 351          | EEEEFDWEDM                           | SPTLDRSRAG         | EFLR <b>SSVPAL</b> <b>GSVRARPRVG</b> <b>NTSDFHLSD</b> |
| 401          | <b>IKNGVSHQLR</b>                    | <b>ENWSLSQ</b> NYP | <b>HTSNRVDTRA</b> GKDLKVLASS VGLVSSNSEF               |
| 451          | GAPPFDSIQD                           | VNSRFGRALP         | DGTWPHLSAR GPNSLPVPSA HLHHLANPGN                      |
| 501          | AMSNRLQGKP                           | LYRPENQVSQ         | SHLNDHTQQN QMLVNYLPSS SAMAPRPHQS                      |
| 551          | LLTHVSHGYP                           | PHGSTIRPSL         | SIQGGEAMHP LSSGVLSQIG ASNQPPGGAF                      |
| 601          | SGLIGSLMAQ                           | GLISLNNQPA         | GQGPLGLEFD ADML <b>KIRNES</b> <b>AISALYGLP</b>        |
| 651          | <b>RQCTTCGLRF</b>                    | KCQEEHSKHM         | DWHVTKNRMS KNHKQNPSRK WFVSASHMLS                      |
| 701          | GAEALGAEAV                           | PGFLPTEPTT         | EKKDDEDMAV PADEDQTSKA LCGEPFEDFY                      |
| 751          | SDETEEWMYK                           | GAVYMNAPPEE        | STTDHDKSQL GPIVHAK <b>CRP</b> <b>ESNGGDMEEG</b>       |
| 801          | <b>SQR</b> KKMRS                     |                    |                                                       |



| Bait protein | Interacting protein identified by MS |                    | Sequence coverage (%) |                   |                   |
|--------------|--------------------------------------|--------------------|-----------------------|-------------------|-------------------|
| AtCLPS3      | AtSYM5                               |                    | 3                     |                   |                   |
| 1            | MASYSRARLK                           | DLANSAKSAT         | ELPPKLQRLR            | YMRRDLQKDD        | SVFPTPELLPH       |
| 51           | LFDLLSDQFG                           | AVRKFVAEIL         | GEIGLKYVEL            | IPEIVPLLIK        | SLEDETPAVA        |
| 101          | RQVIACGADL                           | FRSTLERVAV         | QGLHSSSELND           | LLESSWTWLI        | KFKDEICSV         |
| 151          | FKQGNISGKVL                          | CAMKFVEALI         | LLYTPHEGIE            | ADFNISILRG        | GHPVLKIGDL        |
| 201          | <b>STIASQKLGL</b>                    | LLDQLRHPAA         | KSLNSSTIIV            | LINSLSSVAK        | KRPAYCGRIL        |
| 251          | PVLLSLDPLS                           | <b>FLKGVYAAAT</b>  | <b>HLALKTVFLS</b>     | CLKCTHPAAA        | PDRLTSALKE        |
| 301          | IEGGQAAKA                            | KDLFYKTNGS         | IQDKDSVEDT            | KVSVEENPLC        | ASSDVAESNL        |
| 351          | SRKRSGSEYN                           | IDLNGDASDG         | KRARITPSVS            | EESTDGLNGN        | DGVSLPRVAS        |
| 401          | TSTGSPDSRG                           | VSDSGPAQQL         | VGLFGTLVSQ            | GEKAIGSLEI        | LISSISADLL        |
| 451          | TDVVHANMHN                           | IPPCSSYAD          | GTDELVMNMC            | IVGSDAQIKY        | PPSFVAGVLS        |
| 501          | LSTAFPPIAA                           | LINPHNEDEE         | VYSVHVDQQM            | FPAEDARTPP        | GLLATCDTSF        |
| 551          | PENEESNTVS                           | PQNVHYIGNR         | ESGIPGLESS            | AQHDGSGALV        | TNVLSSSTNVE       |
| 601          | AASKNQNASF                           | SGKLLVDVIP         | SMSVDKLEEF            | SPKAVGTVAS        | ASQFVLPKIS        |
| 651          | APVVVLSDEE                           | KDSLQKLVFL         | RIVEAYKQIS            | MSGGSQLRFS        | LLAHLGVEFP        |
| 701          | SELDPWKILQ                           | EHVLSDYLNH         | EGHELTVRVL            | YRLYGEAEAE        | QDFFSSTTAA        |
| 751          | SAYESFLLTV                           | AEALRDSFPP         | SDKSLSKLLG            | DSPHLPKSVL        | MLESFCCPG         |
| 801          | SGEVEKDLQH                           | GDRVTQGLSA         | VWSLILMRPG            | IRNDCLNIAL        | QSAVHHLEEI        |
| 851          | RMKAIRLVAN                           | KLYLSFITE          | QIEEFKDRL             | FSVVSDDCDK        | MDLDLKSPPN        |
| 901          | KPQHSISGMS                           | METPSEATSS         | STSVTEAQR             | LSLYFALCTK        | VLRIFTILRL        |
| 951          | MTNLVFNIIK                           | NASDPVKQAI         | HLQIPILVRT            | MGSSSELLKI        | IADPPSGSDN        |
| 1001         | LLIQVLQTLT                           | EGPTPSELI          | LTIRKLFDR             | IKDVEILFPI        | LPFLPRDDVL        |
| 1051         | RIFPHMVNLP                           | MEKFQVALSR         | VLQSSQSGP             | VLSPEALIA         | IHSIDPARDG        |
| 1101         | IPLKQVTDAC                           | NTCFAQRQTF         | TQQVLAGVLN            | QLVQQIPLPH        | LFHRTVLQAI        |
| 1151         | GAPPALSDFI                           | LEILSRLVSK         | QIWKYPKLWV            | GFLKCTQTTQ        | PQSYKVLQL         |
| 1201         | PPLQLGNALT                           | KIPALR <b>APLT</b> | <b>AHASQPEIQS</b>     | <b>SLPRSTLAVL</b> | GLVPDSQGTQ        |
| 1251         | TSQVQANETQ                           | TSQEQQQQQA         | SEPQQTSSQ             | QVSVPLSHSQ        | VDHQEPSQV         |
| 1301         | ASQSQSSPIG                           | TVQSANSQSQ         | NSPIDTGR <b>SE</b>    | <b>MSQSQNSPID</b> | <b>TGRSEMSQSQ</b> |
| 1351         | NSPIDTGRSE                           | MSQSQNSPID         | TGRSEMSQ              | SSPIGQSS          | PIGTGQSDMS        |
| 1401         | QTPQVSDSSA                           | PEPTSHTRTS         | DPQASSQTLR            | DDDEKIDDTA        | TSENEVTEIE        |
| 1451         | KSKESSEEEEE                          | EEEEEEE            |                       |                   |                   |

| Bait protein | Interacting protein identified by MS |                    | Sequence coverage (%) |            |            |
|--------------|--------------------------------------|--------------------|-----------------------|------------|------------|
| AtFY         | AtFY                                 |                    | 2                     |            |            |
| 1            | MYAGGDMHRG                           | SQMPQPPMMR         | QSSASSTNIN            | PDYHHPSGPF | DPNVDSFGAK |
| 51           | RMRKHTQRR                            | VDYTSTVVRY         | IQARTWQRDS            | RDRITLQPTP | AAAVDMLPTV |
| 101          | AYSNDPSTSF                           | AAKFVHASLN         | KNRCSINRVL            | WTPSGRRLIT | GSQSGEFTLW |
| 151          | NGQSFNFEMI                           | LQAHDQPIRS         | MVWSHNENYM            | VSGDDGGTLK | YWQNNMNNVK |
| 201          | ANKTAHKESI                           | RDLSFCKTDL         | KFCSCSDDTT            | VKVDWFTKCV | DESSLTGHGW |
| 251          | DVKSVDWHPT                           | KSLLVSGGKD         | QLVKLWDTRS            | GRELCSLHGH | KNIVLSVKWN |
| 301          | QNGNWLLTAS                           | KDQIIKLYDI         | RTMKELQSFR            | GHTKDVTSLA | WHPCHEEYFV |
| 351          | SGSSDGSICH                           | WIVGHENPQI         | EIPNAHDNSV            | WDLAWHPIGY | LLCSGSNDHT |
| 401          | TKFWCRNRPA                           | DNPRD <b>VLMQN</b> | <b>QGYNEQGFR</b>      | QPDNFQPSA  | SPIPGAFVPG |
| 451          | LTRNEGTIPG                           | IGIAMPFDAS         | SQGDHKQPLP            | GSMALGAPPL | PPGPHPSLLG |
| 501          | SGQQQGYQQQ                           | QQHQGHPPQM         | LPMNMPHHQ             | LPPSSHMLPH | PHHLPRPMQM |
| 551          | PPHGHMPPPS                           | MPMSHQMPGS         | MGMQGGMNPQ            | MSQSHFMGAP | SGVFQGPNS  |
| 601          | GGPQMYPPQR                           | GGFNRPQMIP         | GYNNPFQQQQ            | QPPLPPGPPP | NNNQHQ     |

| Bait protein | Interacting protein identified by MS |            | Sequence coverage (%) |                        |
|--------------|--------------------------------------|------------|-----------------------|------------------------|
| AtFY         | AtCPSF100                            |            | 8                     |                        |
| 1            | MGTSVQVTPL                           | CGVYNENPLS | YLVSIDGFNF            | LIDCGWNDLF DTSLLEPLPR  |
| 51           | VASTIDAVLL                           | SHPDTLHIGA | LPYAMKQLGL            | SAPVYATEPV HRLGLLTMYP  |
| 101          | QFLSRKQVSD                           | FDLFTLDDID | SAFQNVIRLT            | YSQNYHLSGK GEGIVIAPHV  |
| 151          | AGHMLGGSIW                           | RITKDGEDVI | YAVDYNHRKE            | RHLNGTVLQS FVRPAVLITD  |
| 201          | AYHALYTNQT                           | ARQQRDKEFL | DTISKHLEVG            | GNVLLPVDIA GRVLELLLIL  |
| 251          | EQHWSQRGFS                           | FPIYFLTYVS | SSTIDYVKSF            | LEWMSDSISK SFETS RNAF  |
| 301          | LLRHVTLIN                            | KTDLDNAPPG | PKVVLASMAS            | LEAGFAREIF VEWANDPRNL  |
| 351          | VLFTETGQFG                           | TLARMLQSAP | PPKFVKVTMS            | KRVPLAGEEL IAYEEEEQNR  |
| 401          | KREEALRASL                           | VKEEETKASH | GSDDNSSEPM            | IIDTKTHDV VGSHGPAYKD   |
| 451          | ILIDGFVPPS                           | SSVAPMFPYY | DNTSEWDDFG            | EIINPDDYVI KDEDMDRGAM  |
| 501          | HNGGDVDGRL                           | DEATASLMLD | TRPSKVMSE             | LIVTVSCSLV KMDYEGRS DG |
| 551          | RSIKSMIAHV                           | SPLKLVLVHA | IAEATEHLKQ            | HCLNNICPHV YAPQIEETVD  |
| 601          | VTSDLCAKVV                           | QLSEKLMNSV | IFKKLGDSEV            | AWVDSEVGKT ERDMRSL LPM |
| 651          | PGAASPHKPV                           | LVGDLKIADF | KQFLSSKGVQ            | VEFAGGGALR CGEYVTLR KV |
| 701          | GPTGQKGGAS                           | GPQQILIEGP | LCEDYYKIRD            | YLYSQFYLL              |

| Bait protein | Interacting protein identified by MS |            | Sequence coverage (%) |                        |
|--------------|--------------------------------------|------------|-----------------------|------------------------|
| AtFY         | AtCLPS3                              |            | 5                     |                        |
| 1            | MAYGGPSMNP                           | PALSGAVPGS | ANLKQVKLER            | ESELRIEVSE EPLRLRVVNG  |
| 51           | TAEIFGSELP                           | PEIWRTFPPR | MKFAVFTWYG            | ATIEMDGVTE TDYTADETPM  |
| 101          | VSYINVHAIL                           | DARRRFAKAS | TSNDPESSQG            | PRVIVVGPTD SGKSTLT KML |
| 151          | LSWAAKQGWR                           | PTFVDLDVGQ | GSITIPGSIA            | AAPIEMPLDP VEGFPLDMAL  |
| 201          | VYYYGHASPN                           | MNVELYKALV | KELAQVLEKQ            | FVGNPESRAA GMVINTMGWI  |
| 251          | EGIGYELLLH                           | AIDTFNASVV | LVLGQEKLF             | RLKDVLRSKS NVDVVKLHKS  |
| 301          | GGVVARVKEV                           | RKRSRNFKIQ | EYFYGLSKEL            | SPYANTSSFS DLQVFRIGGG  |
| 351          | PQAPKSALPA                           | GSTSVSNPLR | VTPVNIDDRD            | LLHSVLAVSY AEEPDIISS   |
| 401          | NVSGFVYVTE                           | VNVQKKKITY | LAPSPGTLPS            | KLLVAGSLAW LESV        |

| Bait protein | Interacting protein identified by MS |            | Sequence coverage (%) |                         |
|--------------|--------------------------------------|------------|-----------------------|-------------------------|
| AtFY         | AtCPSF73-II                          |            | 2                     |                         |
| 1            | MAIDCLVLGA                           | GQEIGKSCVV | VTINGKKIMF            | DCGMHMG CDD HNRYPNFSLI  |
| 51           | SKSGDFDNAI                           | SCIIITHFHM | DHVGALPYFT            | EVCYNGPIY MSYPTKALSP    |
| 101          | LMLEDYRRVM                           | VDRRGEELF  | TTHIANCMK             | KVIAIDLKQT IQVDEDLQIR   |
| 151          | AYYAGHVLGA                           | VMVYAKMGDA | AIVYTG DYNM           | TTDRHLGAAK IDRLQLDLLI   |
| 201          | SESTYATTIR                           | GSKYPREREF | LQAVHKCVAG            | GGKALIPSFA LGRAQELCML   |
| 251          | LDDYWERMNI                           | KVPIYFSSGL | TIQANMY YKM           | LISWTSQNVK EKHNTHPFD    |
| 301          | FKNVKDFDRS                           | LIHAPGPCVL | FATPGMLCAG            | FSLEVF KHW A PSPLNLVALP |
| 351          | GYSVAGTVGH                           | KLMAGKPTTV | DLYNGTKVDV            | RCKVHQVAFS PHTDAKGIMD   |
| 401          | LTKFLSPKNV                           | VLVHGEKPSM | MILKEKITSE            | LDIPCFVPAN GETVFASTT    |
| 451          | YIKANASDMF                           | LKSCSNPNFK | FSNSTQLRVT            | DHRTADGVLV IEKSKKAKIV   |
| 501          | HQDEISEVLH                           | EKNHVVSLAH | CCPVKVKGES            | EDDDVDLIKQ LSakilKTVS   |
| 551          | GAQIHESENC                           | LQSREKEESQ | FSSLLMSSYS            | SDSTAARDQH APLLRPRHDG   |
| 601          | SFSSSSSSAR                           | PTALAVLLGR | ITGHRAPSML            | VRETAARALE ERRIDWGYSK   |
| 651          | PVVAADILWN                           | AALVLASAVM | LVGTVEERP N           | EPIRVWICVY GLQCLFHVV L  |
| 701          | VWSEYWR RNS                          | TRRARDLESY | DHEDYNIEYD            | YEQSDDNST TYRLSVIFLA    |
| 751          | IDVFFAVFCV                           | VLACLVGIAL | CCCLPCIIAL            | LYAVAGTNLE TPFLAGFIQE   |
| 801          | GVSEAELGVL                           | PLYKFKAFHS | NEKNITGPGL            | LHMSEFI                 |

## **Zhao et al., Supplemental Materials and Methods**

### **Constructions of fusion proteins**

The Gateway system (Invitrogen Inc.) was used for the cloning of the Arabidopsis CPSF cDNA sequences (Xu et al., 2006) into the TAP tag containing binary vectors (TAPi; Rohila et al., 2004; a gift from Dr. Michael Fromm, University of Nebraska). Briefly, the PCR-amplified CPSF cDNA sequences were first cloned into the pENTR clones, as described by the manufacturer. After being confirmed by sequencing, the CPSF cDNAs were fused to the binary vectors through LR recombination reactions. After fusion, the TAPi tag sequences were either located at the C-terminus of the protein coding sequences, such as AtCPSF30, AtCPSF73-I, AtCLPS3, and AtFY, or at the N-terminus, as in the case of AtCPSF73-II and AtCPSF100 (Fig. 1). The cloning of AtCLPS3 and AtFY was described in Xing et al. (2008a and b). Plasmids containing the insertions encoding the TAP-fused proteins were transformed into the *Agrobacterium* strain GV3505 by electroporation (Xu and Li, 2008).

### **Cell culture conditions**

*Arabidopsis thaliana* cell culture (MM1 from *Landsberg erecta*, a gift from Dr. Chris Makaroff, Miami University) was maintained and transformed as described by Menges and Murray (2004), with modifications. Briefly, wild-type or transgenic cell cultures were maintained in 250 ml flasks containing 50 ml MS medium (pH 5.7, 4.5 g Murashige Skoog basal salt mixture, 0.112 g vitamin B5, 30 g sucrose, 0.5 mg alpha-Naphthylacetic acid (NAA), and 0.05 mg kinetin, per liter). The cell cultures were rotated on a shaker at 130 rpm (23 °C; 16/8 hr photoperiod). The cells were sub-cultured every 7 days by transferring 10% (5 ml) of old cell culture into fresh media. The system can be scaled up to 1000 ml cell culture in 5-liter flasks when large amounts of cells are needed for proteomic study.

### **Transformation of *Arabidopsis* cell cultures**

To stably introduce the TAP-fused CPSF constructs into *Arabidopsis* suspension cell cultures, a modified *Agrobacterium*-mediated transformation method was used (Menges and Murray, 2004). For each transformation, 10 ml of an early stationary phase cell

culture (seven days after fresh sub-culturing) was sub-cultured in 50 ml MS medium for two days. Ten ml of this exponentially growing cell culture was again sub-cultured into 50 ml fresh MS medium and was used for transformation. The day before transformation, *Agrobacterium* was prepared by inoculating into Luria-Bertani (LB) media containing 40 µg/ml of tetracycline and shaken overnight at 28°C. The next day, 100 µl of *Agrobacterium* was washed three times with 1 ml MS medium (by centrifugation and re-suspension) and re-suspended in 900 µl MS medium.

For each transformation, 100 µl washed *Agrobacterium* and 100 µl (50 mM) acetosyringone (3', 5'-dimethoxy-4'-hydroxyacetophenone, final concentration 100 µM; Acros Organic Inc.) were added to the two-day-old fresh sub-culture mentioned above, and the mixture was co-incubated at 23°C for two days. Two days later, the infected cell culture was transferred into a 50-ml Falcon tube and centrifuged for 5 min at 387 rpm, without applying brake force. The cells were then gently washed 3 times with MS medium and cultured in 20 ml of MS medium, supplemented with Cefotaxime (Bioplus Inc.; 100 µg/ml final concentration), which eliminates remaining *Agrobacterium*. After 3 days, the culture was washed with MS medium three times and re-suspended in 10 ml fresh MS medium. Then, 2.5 ml cell culture was spread on a MS plate containing 0.8% (W/V) agar, 100 µg/ml cefotaxime and 800 µg/ml glufosinate ammonium (Sigma Inc.). Plates were kept under light for 2 to 3 weeks. When calli were about the diameter of 0.5 centimeters, a single callus from each transformation was selected, crunched by sterilized pipette tips, and cultured with 10 ml of MS medium containing 100 µg/ml cefotaxime and 800 µg/ml glufosinate ammonium. The expressions of the TAP-fused proteins were detected by Western blotting using an antibody specifically against the TAP tag (peroxidase anti-peroxidase soluble complex antibody, Sigma 1291). For each assay, cells from a 1 ml cell culture were collected by spinning. About 20 to 50 µl of 1X SDS-PAGE loading buffer was added to the pellet and boiled at 100 °C for 5 min. The samples were separated on a 12% SDS-PAGE gel. The proteins were transferred to a polyvinylidene fluoride (PVDF) membrane for detection, as described below.

### **TAP purification**

TAP purification was done as described by Rohila et al. (2004), with slight modification. About 100 grams of cells (fresh weight) were used for a typical mass

spectrometry identification. Briefly, cells were ground in liquid nitrogen with acid washed quartz (Sigma Inc.) to fine powder. About 150 ml of extraction buffer (20mM Tris/HCl, pH8.0, 150 mM NaCl, 0.1% NP-40 [Igepal CA-630, Sigma Inc.], 2.5 mM EDTA, 10 mM  $\beta$ -mercaptoethanol, 1 mM phenylmethylsulphonyl fluoride (PMSF), 2 mM Benzamide, 20 mM NaF, and 0.1% [V/V] of protease inhibitors cocktail [Sigma Inc.]) was added to the ground cells and mixed by stirring for about 20 min on ice. The mixture was spun at 10,000xg for 40 min at 4 °C. The supernatant was transferred to a pre-chilled tube and incubated with 100  $\mu$ l (bed volume) IgG beads (Immunoglobulin G; GE Health Inc.) at 4°C for 2-4 h. The IgG beads were then collected by passing through a mini column (Bio-Rad Inc.), where the beads were first washed with 10 ml immunoprecipitation-150 (IPP-150) buffer (10mM Tris/HCl, pH8.0, 150mM NaCl, 0.1% NP40, 1 mM PMSF and 1/1000 protease inhibitor cocktail) 3 times, followed by 10 ml tobacco etch viral protease (TEV) cleavage buffer (10mM Tris/HCl, pH8.0, 150mM NaCl, 0.1% NP40, 0.5mM EDTA, 1mM DTT, 1 mM PMSF and 1/1000 protease inhibitor cocktail) once. After the washes, 1 ml TEV cleavage buffer, 10  $\mu$ l 0.1 M DTT, and 10  $\mu$ l (100 units) of TEV (Invitrogen Inc.) were added to the same mini column. After mixing by gentle flicks, the column was incubated at 4°C overnight with gentle rocking. The next day, the TEV-digested mixture was passed through the mini column, and the flow-through was collected into a new mini column.

One hundred  $\mu$ l (bed volume) calmodulin affinity beads (Invitrogen Inc.) were prepared by equilibrating with 3 ml of calmodulin binding buffer (10 mM Tris/HCl, 150 mM NaCl, 1 mM Mg-acetate, 1 mM imidazole, 2 mM CaCl<sub>2</sub>, 0.1% NP40 [V/V], 10 mM  $\beta$ -mercaptoethanol, 1 mM PMSF and 1/1000 protease inhibitor cocktail, pH 8.0) 3 times prior to calcium-dependent binding. Three ml of calmodulin binding buffer and 3  $\mu$ l of 1M CaCl<sub>2</sub> were added to the flow-through collected from the previous step (IgG binding). The column was incubated at 4°C for 1 h. After incubation, the column was drained, and the beads were washed with 10 ml of IPP 150 three times. Finally, the proteins were eluted with 1 to 1.5 ml of elution buffer (10 mM Tris/HCl, 150 mM NaCl, 1 mM Mg-acetate, 1 mM imidazole, 2 mM ethylene glycol tetraacetic acid (EGTA), 0.1 % NP40 (V/V), 10 mM  $\beta$ -mercaptoethanol, 1 mM PMSF and 1/1000 protease inhibitor cocktail,

pH 8.0) into the desired number of fractions, which were monitored by absorbance at 280 nm.

Eluted proteins were precipitated by trichloroacetic acid (TCA) and sodium deoxycholate (DOC) before loading onto a SDS-PAGE gel. To each volume of proteins, 1/100 volume of 2% DOC was added and incubated on ice for 30 min. One hundred percent TCA was added to 6% of the final volume, and the mixture was kept on ice for 1 hour. The tubes were then centrifuged at 2,500 g for 45 min at 4°C. After decanting the supernatant, the pellets were washed with cold 100% acetone and spun at 2,500 g for another 45 min at 4°C. The pellets were dried by a SpecVac for 1 min and dissolved in 10 to 20  $\mu$ l (depending on the desired concentration) SDS-PAGE loading buffer before being separated by 12 % SDS-PAGE gels. The proteins on the gels were then transferred to a PVDF membrane and detected by antibodies, or analyzed by mass spectrometry as described below.

### **Trypsin digestion and MS analysis**

After being separated by SDS-PAGE and stained by Coomassie blue R-250 (Sigma Inc.), the desired bands were cut from the gel and chopped into small fragments before being transferred into 1.5 ml Eppendorf tubes. Gel fragments were washed with 300  $\mu$ l 50% methanol (V/V) by vortexing 15 min at room temperature. The supernatant was decanted by spinning. The washing was repeated once. Three hundred  $\mu$ l 50% acetonitrile (ACN; Sigma Inc.)/50mM  $\text{NH}_4\text{HCO}_3$  (V/V; pH 9.0) was added and vortexed for 30 min. The supernatant was decanted after spinning. Three hundred  $\mu$ l 50% ACN/10mM  $\text{NH}_4\text{HCO}_3$  (V/V) was added and vortexed for 30 min again. The supernatant was decanted after spinning. Five hundred  $\mu$ l 100% ACN was added and vortexed for 10 min. The supernatant was decanted after spinning. Then the tubes were dried in a SpecVac for 10 min. The dried gel can be stored at -20 °C for the next step.

The second day, 100  $\mu$ l 10 mM DTT/25 mM  $\text{NH}_4\text{HCO}_3$  was added to the dried gel and incubated at 56°C for 1 hour. The DTT/  $\text{NH}_4\text{HCO}_3$  solution was then removed, and 55 mM iodoacetamide (Sigma Inc.) was added to merge the gel (ca. 25  $\mu$ l). The samples were incubated in the dark for 45 min at room temperature. Then iodoacetamide was removed, and the samples were washed with 500  $\mu$ l 25 mM  $\text{NH}_4\text{HCO}_3$  by vortexing for 10 min. Finally, the liquid was removed, and the gel was dehydrated by adding 100  $\mu$ l

100% ACN and vortexing 5 min. After drying in a SpecVac for 5 min, the samples were ready for Trypsin digestion.

The digestion was started by adding 250  $\mu$ l 10mM  $\text{NH}_4\text{HCO}_3$  (pH 9.0) and 0.5  $\mu$ g sequence grade Trypsin (Promega Inc.) to the gel. The samples were kept at 37°C overnight. The next day, the solution containing the digested proteins was separated from the gel by transferring to a new tube where final digestion products were pooled. Two hundred and fifty  $\mu$ l 0.1% trifluoric acid (TFA)/water was added to the tubes containing the gels, and the tubes were shaken for 30 min. The liquid was transferred to the tubes where they were pooled. Two hundred and fifty  $\mu$ l 0.1% TFA/30% ACN (V/V) was added to the gel tubes, and the tubes were shaken for 30 min. The supernatant was moved to the tube where samples were pooled. Two hundred and fifty  $\mu$ l 0.1% TFA/60% ACN was added, and the tubes were shaken for 30 min. The supernatant was pooled again as described above. Two hundred and fifty  $\mu$ l 0.1% TFA/90% ACN (V/V) was added, and the tubes were shaken for 30 min. The supernatant was pooled again. Finally, the pooled products were dried to minimal volumes by a SpecVac and reconstituted into 10  $\mu$ l TFA/water in the case of over-drying. The digested proteins were then sent to a proteomics facility for identification using liquid chromatographic with tandem mass spectrometry (LC/MS/MS, Mass Spectrometry and Proteomics Facility, Ohio State University).

### **Western blot analysis**

After separation by SDS-PAGE, proteins were transferred to a PVDF membrane and detected using chemiluminescence. Briefly the proteins were first detected by primary antibodies raised against the proteins (Xu et al. 2006; Xing et al., 2008a; AtFY antibody was a gift from Caroline Dean, John Innes Centre) at 1:1000 dilution. Then a horse radish conjugated secondary antibody (goat anti-rabbit IgG-HRP; Sigma Inc.) was used at 1:2000 dilution for two hours (Copse and Fowler, 2002). After the incubation with the secondary antibody, the signal was detected using an ECL detection kit as described by the manufacturer's instructions (GE Healthcare Inc).
